# Supplementary material for: Pulmonary function and radiological features 4 months after COVID-19: first results from the national prospective observational Swiss COVID-19 lung study
Source: PubMed Central journal article supplement — Eur Respir J. 2021 Apr 29;57(4):2003690. doi: 10.1183/13993003.03690-2020 (PMC8082329; doi:10.1183/13993003.03690-2020), 2021-04-29

## Supplement

### **Pulmonary function and radiological features four months after COVID-19: first results from the national prospective observational Swiss COVID-19 lung study**

Guler SA<sup>1</sup>, Ebner L<sup>2</sup>, Beigelmann C<sup>3</sup>, Bridevaux PO<sup>4</sup>, Brutsche M<sup>5</sup>, Clarenbach C<sup>6</sup>, Soccac PM<sup>7</sup>, Garzoni C<sup>8,9</sup>, Geiser T<sup>1,10</sup>, Ott SR<sup>11</sup>, Lenoir A<sup>12</sup>, Mancinetti M<sup>13</sup>, Naccini B<sup>14</sup>, Piquilloud Imboden L<sup>15</sup>, Prella M<sup>12</sup>, Que YA<sup>16</sup>, von Garnier C<sup>12</sup>, Funke-Chambour M<sup>1,14</sup>

<sup>1</sup>Department of Pulmonary Medicine, Inselspital, Bern University Hospital, University of Bern, Bern, Switzerland

<sup>2</sup>Department of Diagnostic, Interventional and Pediatric Radiology, Inselspital, Bern University Hospital, University of Bern, Switzerland.

<sup>3</sup>Radiodiagnostic and Interventional Radiology, CHUV-University Hospital, Lausanne, Switzerland

<sup>4</sup>Service de Pneumologie, Hôpital du Valais, Sion, Switzerland

<sup>5</sup>Lung Center, Kantonsspital St. Gallen, St. Gallen, Switzerland

<sup>6</sup>Pneumology, University Children Hospital Zürich, Zürich, Switzerland.

<sup>7</sup>Faculty of Medicine, Geneva University, Geneva, Switzerland.

<sup>8</sup>Clinic of Internal Medicine and Infectious Diseases, Clinica Luganese Moncucco, Lugano, Switzerland;

<sup>9</sup>Department of Infectious Diseases, Bern University Hospital, University of Bern, Bern, Switzerland

<sup>10</sup>Department for BioMedical Research, University of Bern, Bern, Switzerland.

<sup>11</sup>Department of Pulmonary Medicine, St. Claraspital AG, Basel, Switzerland

<sup>12</sup>Department of Pulmonary Medicine, University Hospital Lausanne, Lausanne, Switzerland

<sup>13</sup>Department of Internal Medicine, University and Hospital of Fribourg, Switzerland

<sup>14</sup>Tessin Department of Pulmonary medicine, Clinica Luganese Moncucco, Lugano,  
Switzerland

<sup>15</sup>Adult Intensive care unit, University Hospital and University of Lausanne, Lausanne  
Switzerland

<sup>16</sup>Department of Intensive Care Medicine, Inselspital, Bern University Hospital, University of  
Bern, Bern, Switzerland

**Table S1.** Functional and radiological features at follow-up after severe/critical and mild/moderate COVID-19 after exclusion of patients with previously diagnosed chronic lung disease.

|                                                  | <b>Severe/critical disease (n=60)</b> | <b>Mild/moderate disease (n=46)</b> |                 |
|--------------------------------------------------|---------------------------------------|-------------------------------------|-----------------|
|                                                  | <i>Number (%), mean (SD)</i>          |                                     | <i>p-value*</i> |
| <b>FUNCTIONAL PARAMETERS AT FOLLOW-UP</b>        |                                       |                                     |                 |
| FEV/FVC, %                                       | 95.8 (11.8)                           | 85.3 (12.5)                         | <0.001          |
| TLC, % predicted                                 | 85.5 (19.1)                           | 101.0 (18.6)                        | <0.001          |
| FVC, % predicted                                 | 87.6 (20.1)                           | 94.8 (17.3)                         | 0.056           |
| FEV1, % predicted                                | 91.5 (19.6)                           | 93.7 (15.7)                         | 0.51            |
| DLCO, % predicted                                | 75.4 (17.3)                           | 96.3 (19.6)                         | <0.001          |
| p <sub>a</sub> O <sub>2</sub> , mmHg             | 80.8 (11.4)                           | 88.2 (8.1)                          | <0.001          |
| 6-MWD, meters                                    | 464 (95)                              | 576 (78)                            | <0.001          |
| O <sub>2</sub> nadir on 6MWT                     | 90 (3.9)                              | 92 (3.1)                            | 0.008           |
| O <sub>2</sub> desaturation 6MWT                 | 5.3 (3.5)                             | 2.7 (3.1)                           | <0.001          |
| <b>RADIOLOGICAL FEATURES AT FOLLOW-UP (n=48)</b> |                                       |                                     |                 |
| Hypoattenuation mosaic pattern                   | 65%                                   | 13%                                 | 0.01            |
| Reticulations                                    | 58%                                   | 13%                                 | 0.047           |

From the original cohort (n=113), 2 patients with ILD and 5 patients with COPD (2 of those with relevant emphysema) were excluded.

**Abbreviations:** COPD, chronic obstructive pulmonary disease; DLCO, diffusing capacity of the lung for carbon monoxide; FEV1, forced vital capacity in 1 minute; FVC, forced vital capacity; p<sub>a</sub>O<sub>2</sub>, arterial partial pressure of oxygen; TLC, total lung capacity; 6MWD, 6-minute walk distance; 6MWT, 6-minute walk test

**Table S2.** Correlation between duration of mechanical ventilation and functional parameters at follow-up.

| <b>Duration of mechanical ventilation, days</b> | <b>Spearman's correlation, r</b> | <b>p-value</b> |
|-------------------------------------------------|----------------------------------|----------------|
| TLC, % predicted                                | -0.43                            | 0.008          |
| FVC, % predicted                                | -0.28                            | 0.09           |
| FEV1, % predicted                               | -0.23                            | 0.16           |
| FEV1/FVC, %                                     | -0.01                            | 0.93           |
| DLCO, % predicted                               | -0.42                            | 0.01           |
| p <sub>a</sub> O <sub>2</sub> , mmHg            | -0.23                            | 0.18           |
| 6-MWD, meters                                   | -0.22                            | 0.18           |
| O <sub>2</sub> nadir on 6MWT                    | -0.07                            | 0.68           |
| Pl <sub>max</sub> , kPa                         | 0.06                             | 0.73           |
| PE <sub>max</sub> , kPa                         | 0.21                             | 0.26           |

**Abbreviations:** DLCO, diffusing capacity of the lung for carbon monoxide; FEV1, forced vital capacity in 1 minute; FVC, forced vital capacity; p<sub>a</sub>O<sub>2</sub>, arterial partial pressure of oxygen; Pl<sub>max</sub>, maximal inspiratory pressure; PE<sub>max</sub>, maximal expiratory pressure; TLC, total lung capacity; 6MWD, 6-minute walk distance; 6MWT, 6-minute walk test

**Table S3.** Radiological features at follow-up after severe/critical and mild /moderate COVID-19.

|                                | <b>Severe/critical disease (n=44)</b>      | <b>Mild/moderate disease (n=8)</b> |                |
|--------------------------------|--------------------------------------------|------------------------------------|----------------|
|                                | <i>Number (%), mean (SD), median (IQR)</i> |                                    | <i>p-value</i> |
| Hypoattenuation mosaic pattern | 66%                                        | 13%                                | <b>0.007</b>   |
| Reticulations                  | 59%                                        | 13%                                | 1              |
| Architectural distortion       | 52%                                        | 13%                                | 0.055          |
| Bronchiectasis                 | 43%                                        | 13%                                | 0.13           |
| Curveylinear lines             | 39%                                        | 5%                                 | 0.69           |
| Consolidation                  | 30%                                        | 25%                                | 1              |
| Honeycombing                   | 11%                                        | 0                                  | 1              |
| Cysts                          | 9%                                         | 0                                  | 1              |
| Interlobular septal thickening | 2%                                         | 0                                  | 1              |
| Pleural thickening             | 2%                                         | 0                                  | 1              |
| Tree in bud pattern            | 0                                          | 0                                  |                |
| Solid nodules                  | 5%                                         | 0                                  | 1              |
| Multifocal distribution        | 47%                                        | 13%                                | 0.12           |
| Focal distribution             | 22%                                        | 24%                                | 0.64           |
| Diffuse distribution           | 11%                                        | 0                                  | 1              |

**Abbreviations:** COVID-19, coronavirus disease 2019

**Figure S1.** Post COVID-19 pulmonary fibrosis 3 months after acute respiratory distress syndrome (ARDS).

Extensive architectural distortion, reticulations and honeycombing representing late effects of post-COVID-19 ARDS.

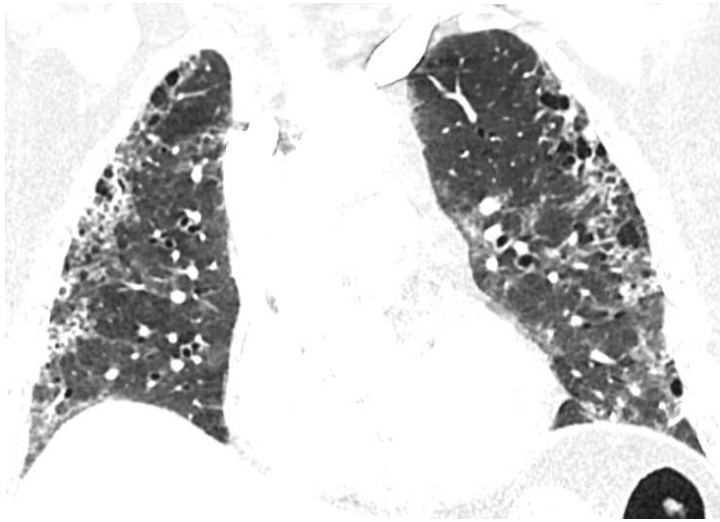

Supplement: ERJ-03690-2020.SUPPLEMENT.pdf [file ERJ-03690-2020.SUPPLEMENT.pdf]
