# Supplementary material for: Pulmonary function and radiological features 4 months after COVID-19: first results from the national prospective observational Swiss COVID-19 lung study
Source: PubMed Central journal article supplement — Eur Respir J. 2021 Apr 29;57(4):2003690. doi: 10.1183/13993003.03690-2020 (PMC8082329; doi:10.1183/13993003.03690-2020), 2021-04-29
Supplement: ERJ-03690-2020.Shareable.pdf [file ERJ-03690-2020.Shareable.pdf]

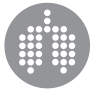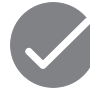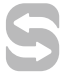

SHAREABLE PDF

# Pulmonary function and radiological features 4 months after COVID-19: first results from the national prospective observational Swiss COVID-19 lung study

Sabina A. Guler <sup>1</sup>, Lukas Ebner<sup>2</sup>, Catherine Aubry-Beigelman<sup>3</sup>, Pierre-Olivier Bridevaux<sup>4</sup>, Martin Brutsche<sup>5</sup>, Christian Clarenbach <sup>6</sup>, Christian Garzoni<sup>7,8</sup>, Thomas K. Geiser<sup>1,9</sup>, Alexandra Lenoir <sup>10</sup>, Marco Mancinetti<sup>11</sup>, Bruno Naccini<sup>12</sup>, Sebastian R. Ott<sup>13</sup>, Lise Piquilloud<sup>14</sup>, Maura Prella<sup>10</sup>, Yok-Ai Que<sup>15</sup>, Paula M. Soccà<sup>16</sup>, Christophe von Garnier<sup>10</sup> and Manuela Funke-Chambour <sup>1,9</sup>

**Affiliations:** <sup>1</sup>Dept of Pulmonary Medicine, Inselspital, Bern University Hospital, University of Bern, Bern, Switzerland. <sup>2</sup>Dept of Diagnostic, Interventional and Pediatric Radiology, Inselspital, Bern University Hospital, University of Bern, Bern, Switzerland. <sup>3</sup>Radiodiagnostic and Interventional Radiology, CHUV-University Hospital, Lausanne, Switzerland. <sup>4</sup>Service de Pneumologie, Hôpital du Valais, Sion, Switzerland. <sup>5</sup>Lung Center, Kantonsspital St. Gallen, St. Gallen, Switzerland. <sup>6</sup>Dept of Pneumology, University Hospital Zurich, Zurich, Switzerland. <sup>7</sup>Clinic of Internal Medicine and Infectious Diseases, Clinica Luganese Moncucco, Lugano, Switzerland. <sup>8</sup>Dept of Infectious Diseases, Bern University Hospital, University of Bern, Bern, Switzerland. <sup>9</sup>Dept for BioMedical Research, University of Bern, Bern, Switzerland. <sup>10</sup>Division of Pulmonary Medicine, Lausanne University Hospital (CHUV), University of Lausanne, Lausanne, Switzerland. <sup>11</sup>Dept of Internal Medicine, University and Hospital of Fribourg, Fribourg, Switzerland. <sup>12</sup>Dept of Pulmonary Medicine, Clinica Luganese Moncucco, Lugano, Switzerland. <sup>13</sup>Dept of Pulmonary Medicine, St. Claraspital AG, Basel, Switzerland. <sup>14</sup>Adult Intensive Care Unit, University Hospital and University of Lausanne, Lausanne, Switzerland. <sup>15</sup>Dept of Intensive Care Medicine, Inselspital, Bern University Hospital, University of Bern, Bern, Switzerland. <sup>16</sup>Division of Pulmonary Medicine, Geneva University Hospitals, Geneva, Switzerland.

**Correspondence:** Manuela Funke-Chambour, Division for Pulmonary Medicine, University Hospital Bern, Bern University, Bern 3010, Switzerland. E-mail: manuela.funke-chambour@insel.ch

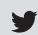

@ERSpublications

**COVID-19 pulmonary sequelae are unknown. The Swiss COVID-19 lung study reports on initial follow-up findings. Severe or critical COVID-19 was associated with significant functional impairment and radiological abnormalities after 4 months.** <https://bit.ly/34sNVvi>

**Cite this article as:** Guler SA, Ebner L, Aubry-Beigelman C, *et al.* Pulmonary function and radiological features 4 months after COVID-19: first results from the national prospective observational Swiss COVID-19 lung study. *Eur Respir J* 2021; 57: 2003690 [<https://doi.org/10.1183/13993003.03690-2020>].

This single-page version can be shared freely online.

## ABSTRACT

**Background:** The infectious coronavirus disease 2019 (COVID-19) pandemic is an ongoing global healthcare challenge. Up to one-third of hospitalised patients develop severe pulmonary complications and acute respiratory distress syndrome. Pulmonary outcomes following COVID-19 are unknown.

**Methods:** The Swiss COVID-19 lung study is a multicentre prospective cohort investigating pulmonary sequelae of COVID-19. We report on initial follow-up 4 months after mild/moderate or severe/critical COVID-19 according to the World Health Organization severity classification.

**Results:** 113 COVID-19 survivors were included (mild/moderate n=47, severe/critical n=66). We confirmed several comorbidities as risk factors for severe/critical disease. Severe/critical disease was

associated with impaired pulmonary function, *i.e.* diffusing capacity of the lung for carbon monoxide ( $D_{LCO}$ ) % predicted, reduced 6-min walk distance (6MWD) and exercise-induced oxygen desaturation. After adjustment for potential confounding by age, sex and body mass index (BMI), patients after severe/critical COVID-19 had a  $D_{LCO}$  20.9% pred (95% CI 12.4–29.4% pred,  $p=0.01$ ) lower at follow-up.  $D_{LCO}$  % pred was the strongest independent factor associated with previous severe/critical disease when age, sex, BMI, 6MWD and minimal peripheral oxygen saturation at exercise were included in the multivariable model (adjusted odds ratio per 10% predicted 0.59, 95% CI 0.37–0.87;  $p=0.01$ ). Mosaic hypoattenuation on chest computed tomography at follow-up was significantly associated with previous severe/critical COVID-19 including adjustment for age and sex (adjusted OR 11.7, 95% CI 1.7–239;  $p=0.03$ ).

**Conclusions:** 4 months after severe acute respiratory syndrome coronavirus 2 infection, severe/critical COVID-19 was associated with significant functional and radiological abnormalities, potentially due to small-airway and lung parenchymal disease. A systematic follow-up for survivors needs to be evaluated to optimise care for patients recovering from COVID-19.
